# Supplementary material for: The mechanism of water pollutant photodegradation by mixed and core–shell WO3/TiO2nanocomposites
Source: Royal Society of Chemistry journal article supplement (doi:10.1039/d3ra01582c), 2023-01-01
Supplement: d3ra01582c1.pdf [file d3ra01582c1.pdf]

## Mechanism of Water Pollutant Photodegradation by Mixed and Core-Shell $\text{WO}_3/\text{TiO}_2$ Nanocomposites

Abdisa Habtamu <sup>a</sup> and Masaki Ujihara <sup>\*b</sup>

---

<sup>a</sup> Graduate Institute of Applied Science and Technology, National Taiwan University of Science and Technology, 43 Keelung Road, 10607, Taipei, Taiwan.

<sup>b</sup> Graduate Institute of Applied Science and Technology, National Taiwan University of Science and Technology, 43 Keelung Road, 10607, Taipei, Taiwan. E-mail: [masaki.ujihara@mail.ntust.edu.tw](mailto:masaki.ujihara@mail.ntust.edu.tw)

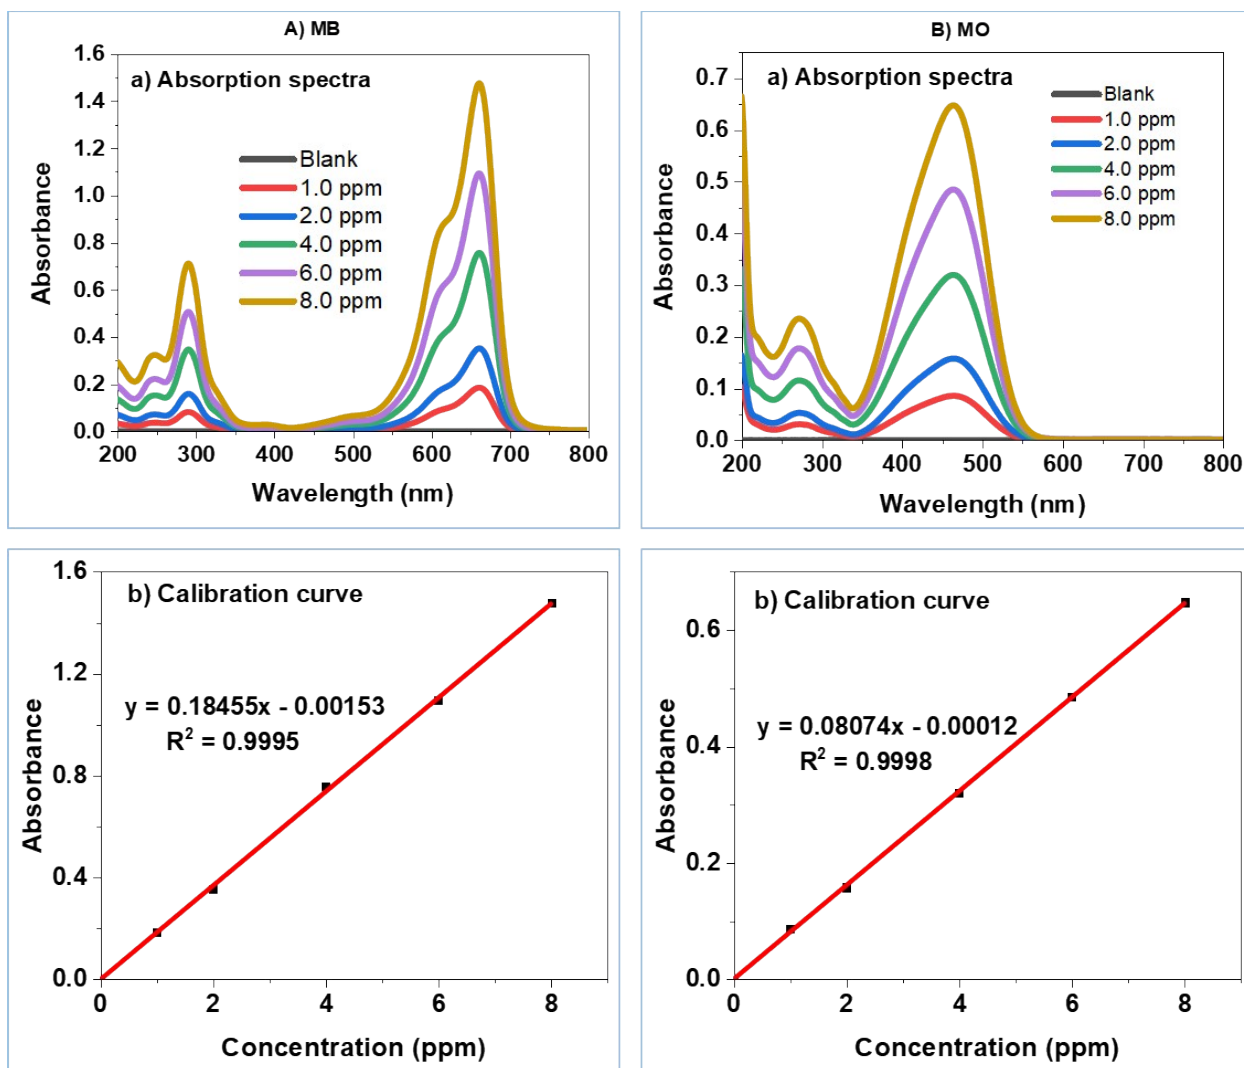

**Figure S1.** UV-vis absorption spectra and calibration curves for (A) MB<sup>+</sup> at 662 nm and (B) 464 nm for MO<sup>-</sup>.

**Table S1** O 1s peak parameters and % area for each composite.

|                                             | <b>Peak Type</b> | <b>Position (eV)</b> | <b>FWHM (eV)</b> | <b>Area</b> | <b>%Area</b> |
|---------------------------------------------|------------------|----------------------|------------------|-------------|--------------|
| 5 wt%<br>WO <sub>3</sub> /TiO <sub>2</sub>  | Peak 1           | 530.35               | 1.242            | 501.23      | 68.81        |
|                                             | Peak 2           | 531.76               | 1.6              | 111.29      | 15.28        |
|                                             | Peak 3           | 533.42               | 1.81             | 115.92      | 15.91        |
| 8 wt%<br>WO <sub>3</sub> /TiO <sub>2</sub>  | Peak 1           | 529.68               | 1.3              | 576.11      | 72.23        |
|                                             | Peak 2           | 530.94               | 1.63             | 144.13      | 18.08        |
|                                             | Peak 3           | 532.75               | 1.54             | 77.04       | 9.668        |
| 10 wt%<br>WO <sub>3</sub> /TiO <sub>2</sub> | Peak 1           | 529.98               | 1.26             | 622.56      | 71.85        |
|                                             | Peak 2           | 531.28               | 1.47             | 152.49      | 17.60        |
|                                             | Peak 3           | 533.01               | 1.405            | 91.47       | 10.56        |
| TiO <sub>2</sub> @WO <sub>3</sub>           | Peak 1           | 530.00               | 1.13             | 477.41      | 75.15        |
|                                             | Peak 2           | 531.00               | 1.37             | 111.04      | 17.48        |
|                                             | Peak 3           | 532.70               | 1.33             | 46.86       | 7.38         |
| WO <sub>3</sub> @TiO <sub>2</sub>           | Peak 1           | 530.00               | 1.211            | 522.03      | 77.76        |
|                                             | Peak 2           | 531.32               | 1.15             | 74.14       | 11.04        |
|                                             | Peak 3           | 532.48               | 1.384            | 75.16       | 11.20        |

**Table S2** Ti 2p peak parameters and % area for each composite.

|                                   | <b>Peak Type</b>     | <b>Position (eV)</b> | <b>FWHM (eV)</b> | <b>Area</b> | <b>%Area</b> |
|-----------------------------------|----------------------|----------------------|------------------|-------------|--------------|
| 5 wt%                             | Ti 2p <sub>3/2</sub> | 459.1                | 1.17             | 424.14      | 64.05        |
| WO <sub>3</sub> /TiO <sub>2</sub> | Ti 2p <sub>1/2</sub> | 464.77               | 2.11             | 238.04      | 35.95        |
| 8 wt%                             | Ti 2p <sub>3/2</sub> | 458.35               | 1.326            | 457.53      | 71.32        |
| WO <sub>3</sub> /TiO <sub>2</sub> | Ti 2p <sub>1/2</sub> | 464.05               | 2.155            | 183.96      | 28.68        |
| 10 wt%                            | Ti 2p <sub>3/2</sub> | 458.92               | 1.15             | 462.72      | 65.34        |
| WO <sub>3</sub> /TiO <sub>2</sub> | Ti 2p <sub>1/2</sub> | 464.62               | 2.17             | 245.48      | 34.66        |
| TiO <sub>2</sub> @WO <sub>3</sub> | Ti 2p <sub>3/2</sub> | 459.25               | 1.154759         | 467.95      | 66.99        |
|                                   | Ti 2p <sub>1/2</sub> | 464.93               | 2.089            | 230.5865    | 33.01        |
| WO <sub>3</sub> @TiO <sub>2</sub> | Ti 2p <sub>3/2</sub> | 458.73               | 1.1              | 467.6004    | 69.18        |
|                                   | Ti 2p <sub>1/2</sub> | 464.42               | 2.05             | 208.3091    | 30.82        |

**Table S3** W 4f peak parameters and % area for each composite.

|                                             | Peak Type                         | Position (eV) | FWHM (eV) | Area  | %Area | W <sup>5+</sup> /W <sup>6+</sup> Ratio | Ti 2p/W 4f Ratio |
|---------------------------------------------|-----------------------------------|---------------|-----------|-------|-------|----------------------------------------|------------------|
| 5 wt%<br>WO <sub>3</sub> /TiO <sub>2</sub>  | W <sup>5+</sup> 4f <sub>7/2</sub> | 35.56         | 1.123     | 46.97 | 32.80 | 3.09                                   | 4.62             |
|                                             | W <sup>5+</sup> 4f <sub>5/2</sub> | 37.44         | 1.206     | 61.24 | 42.77 |                                        |                  |
|                                             | W <sup>6+</sup> 4f <sub>7/2</sub> | 36.48         | 0.779     | 15.71 | 10.97 |                                        |                  |
|                                             | W <sup>6+</sup> 4f <sub>5/2</sub> | 38.25         | 1.106     | 19.27 | 13.46 |                                        |                  |
| 8 wt%<br>WO <sub>3</sub> /TiO <sub>2</sub>  | W <sup>5+</sup> 4f <sub>7/2</sub> | 34.97         | 1.45      | 72.68 | 39.77 | 2.42                                   | 3.51             |
|                                             | W <sup>5+</sup> 4f <sub>5/2</sub> | 36.9          | 1.14      | 56.70 | 31.03 |                                        |                  |
|                                             | W <sup>6+</sup> 4f <sub>7/2</sub> | 36.06         | 0.91      | 20.41 | 11.17 |                                        |                  |
|                                             | W <sup>6+</sup> 4f <sub>5/2</sub> | 37.6          | 1.42      | 32.94 | 18.03 |                                        |                  |
| 10 wt%<br>WO <sub>3</sub> /TiO <sub>2</sub> | W <sup>5+</sup> 4f <sub>7/2</sub> | 35.05         | 1.68      | 123.9 | 53.61 | 4.59                                   | 3.06             |
|                                             | W <sup>5+</sup> 4f <sub>5/2</sub> | 36.95         | 1.07      | 65.89 | 28.50 |                                        |                  |
|                                             | W <sup>6+</sup> 4f <sub>7/2</sub> | 36.35         | 0.75      | 13.43 | 5.81  |                                        |                  |
|                                             | W <sup>6+</sup> 4f <sub>5/2</sub> | 37.54         | 1.12      | 27.95 | 12.09 |                                        |                  |
| TiO <sub>2</sub> @WO <sub>3</sub>           | W <sup>5+</sup> 4f <sub>7/2</sub> | 35.31         | 1.1       | 50.21 | 27.46 | 2.03                                   | 3.82             |
|                                             | W <sup>5+</sup> 4f <sub>5/2</sub> | 37.45         | 1.25      | 72.37 | 39.57 |                                        |                  |
|                                             | W <sup>6+</sup> 4f <sub>7/2</sub> | 36.56         | 1.11      | 35.10 | 19.19 |                                        |                  |
|                                             | W <sup>6+</sup> 4f <sub>5/2</sub> | 38.74         | 1.21      | 25.20 | 13.78 |                                        |                  |
| WO <sub>3</sub> @TiO <sub>2</sub>           | W <sup>5+</sup> 4f <sub>7/2</sub> | 35.2          | 1.23      | 45.46 | 33.70 | 13.40                                  | 5.00             |
|                                             | W <sup>5+</sup> 4f <sub>5/2</sub> | 37.12         | 1.443     | 80.09 | 59.36 |                                        |                  |
|                                             | W <sup>6+</sup> 4f <sub>7/2</sub> | 36.36         | 0.65      | 4.83  | 3.58  |                                        |                  |
|                                             | W <sup>6+</sup> 4f <sub>5/2</sub> | 38.8          | 0.941     | 4.54  | 3.36  |                                        |                  |

**Table S4** Comparison of photocatalysis performance for MB degradation

| Catalyst                                                                     | Preparation method | Light source                                        | Degradation rate    | Rate constant                                              | Reference                                  |
|------------------------------------------------------------------------------|--------------------|-----------------------------------------------------|---------------------|------------------------------------------------------------|--------------------------------------------|
| TiO <sub>2</sub>                                                             | Hydrothermal       | Xe lamp,<br>300 W                                   | 75% in<br>240 min   | 0.00554 min <sup>-1</sup>                                  | W. Wang et al.<br>2019 <sup>46</sup>       |
| Core-shell WO <sub>3</sub> @TiO <sub>2</sub><br>(36 wt% of WO <sub>3</sub> ) | Sol-gel            |                                                     | 100% in<br>240 min  | 0.01485 min <sup>-1</sup><br>2.68 times > TiO <sub>2</sub> |                                            |
| TiO <sub>2</sub>                                                             | Sol-gel            | Halogen lamp,<br>400 W                              | 75% in<br>180 min   | 0.009 min <sup>-1</sup>                                    | *W. A. El-Yazeed &<br>Ahmed, 2019          |
| 10 wt% WO <sub>3</sub> /TiO <sub>2</sub><br>(mixed)                          |                    |                                                     | 99% in<br>180 min   | 0.017 min <sup>-1</sup><br>2 times > TiO <sub>2</sub>      |                                            |
| TiO <sub>2</sub>                                                             | Hydrothermal       | Xe lamp<br>(350 W with<br>420 nm cut-off<br>filter) | 40.7% in<br>150 min | -                                                          | Q. Wang et al.<br>2021 <sup>48</sup>       |
| 10 wt% WO <sub>3</sub> /TiO <sub>2</sub><br>(mixed)                          |                    |                                                     | 87.8% in<br>150 min | -                                                          |                                            |
| TiO <sub>2</sub>                                                             | Precipitation      | Halogen lamp,<br>500 W                              | 12% in<br>60 min    | 0.001 min <sup>-1</sup>                                    | M. F. Mubarak<br>et al. 2022 <sup>65</sup> |
| Core-shell<br>TiO <sub>2</sub> @CoFe <sub>3</sub> O <sub>4</sub>             | Co-precipitation   |                                                     | 91% in<br>60 min    | 0.016 min <sup>-1</sup><br>16 times > TiO <sub>2</sub>     |                                            |
| TiO <sub>2</sub>                                                             | As-purchased       | UV light<br>(365 nm)                                | 80% in<br>120 min   | 0.0117 min <sup>-1</sup>                                   | R. Wahyuono et<br>al. 2019 <sup>51</sup>   |
| 25 wt% WO <sub>3</sub> /TiO <sub>2</sub><br>(mixed)                          | Sol-gel            |                                                     | 92% in<br>120 min   | 0.0185 min <sup>-1</sup><br>1.58 times > TiO <sub>2</sub>  |                                            |
| TiO <sub>2</sub>                                                             | Sol-gel            | UV LED<br>(365 nm)                                  | 24.3% in<br>120 min | 0.0023 min <sup>-1</sup>                                   | This work                                  |
| 8 wt% WO <sub>3</sub> /TiO <sub>2</sub><br>(mixed)                           |                    |                                                     | 94.9% in<br>120 min | 0.0248 min <sup>-1</sup><br>10.78 times > TiO <sub>2</sub> |                                            |
| Core-shell TiO <sub>2</sub> @WO <sub>3</sub><br>(10 wt% WO <sub>3</sub> )    | Hydrothermal       |                                                     | 95.8% in<br>60 min  | 0.0533 min <sup>-1</sup><br>23.17 times > TiO <sub>2</sub> |                                            |
| Core-shell WO <sub>3</sub> @TiO <sub>2</sub><br>(10 wt% WO <sub>3</sub> )    |                    |                                                     | 82.5% in<br>120 min | 0.0141 min <sup>-1</sup><br>6.13 times > TiO <sub>2</sub>  |                                            |

\* W. A. El-Yazeed and A. I. Ahmed, *Inorganic Chemistry Communications*, 2019, **105**, 102-111.

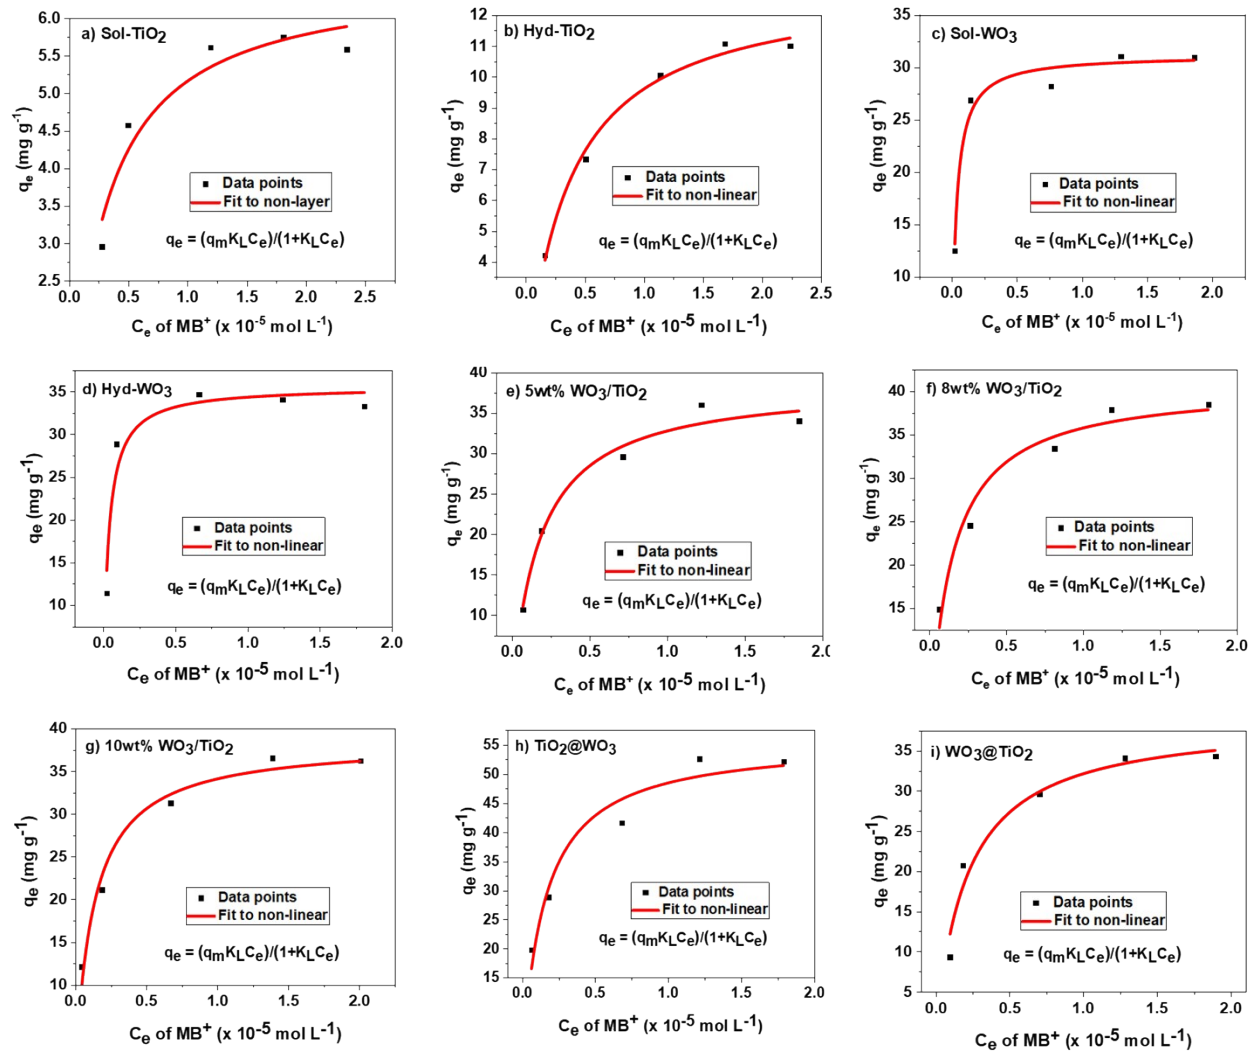

**Figure S2.** Adsorption behaviors of MB<sup>+</sup> onto nanocomposites and non-linear Langmuir isotherm fitting.

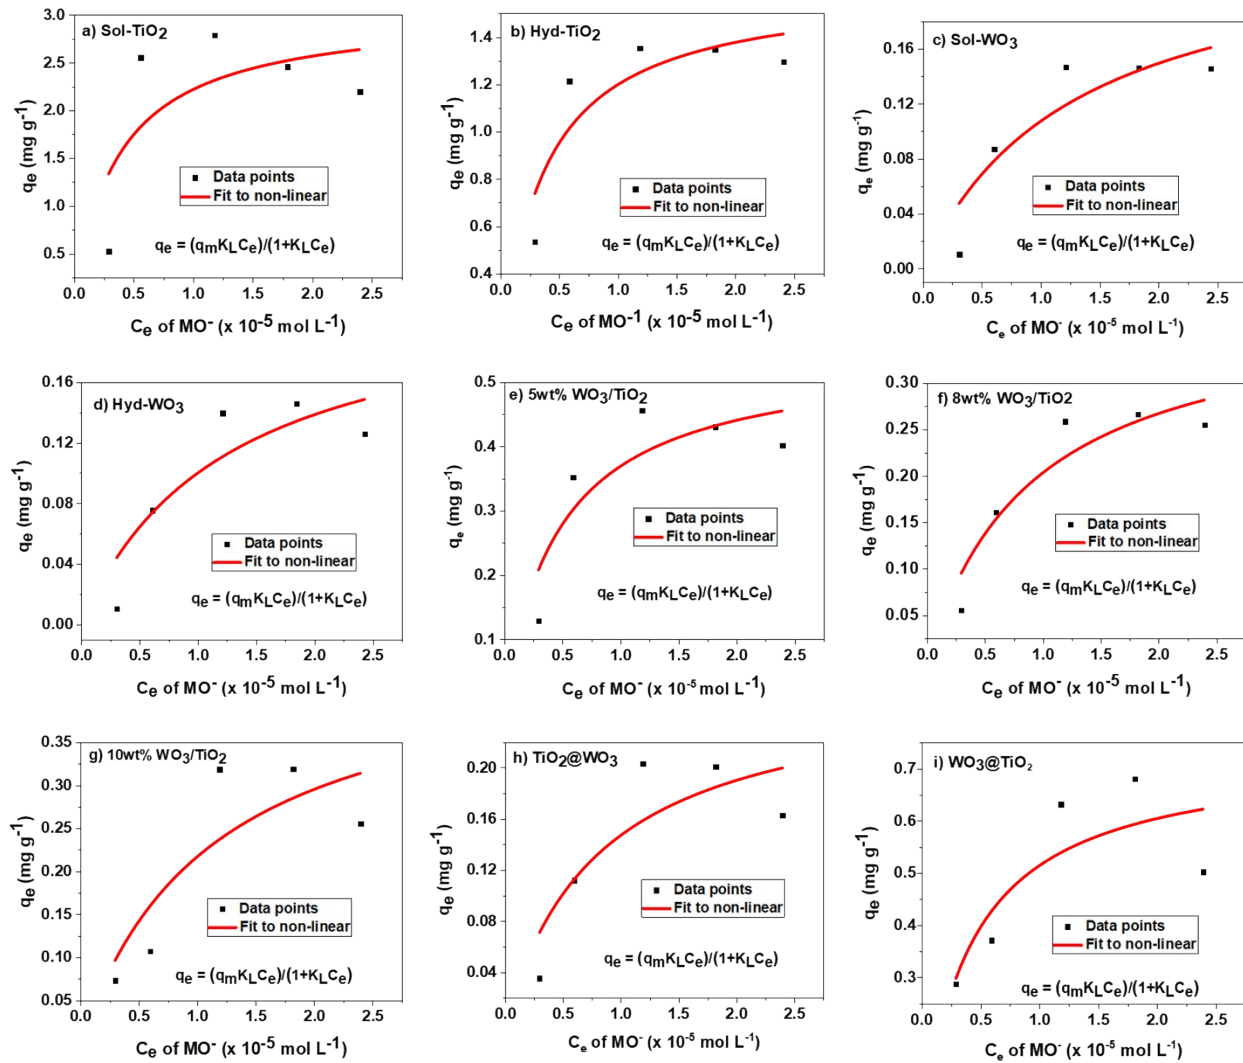

**Figure S3.** Adsorption behaviors of  $\text{MO}^-$  onto nanocomposites and non-linear Langmuir isotherm fitting.



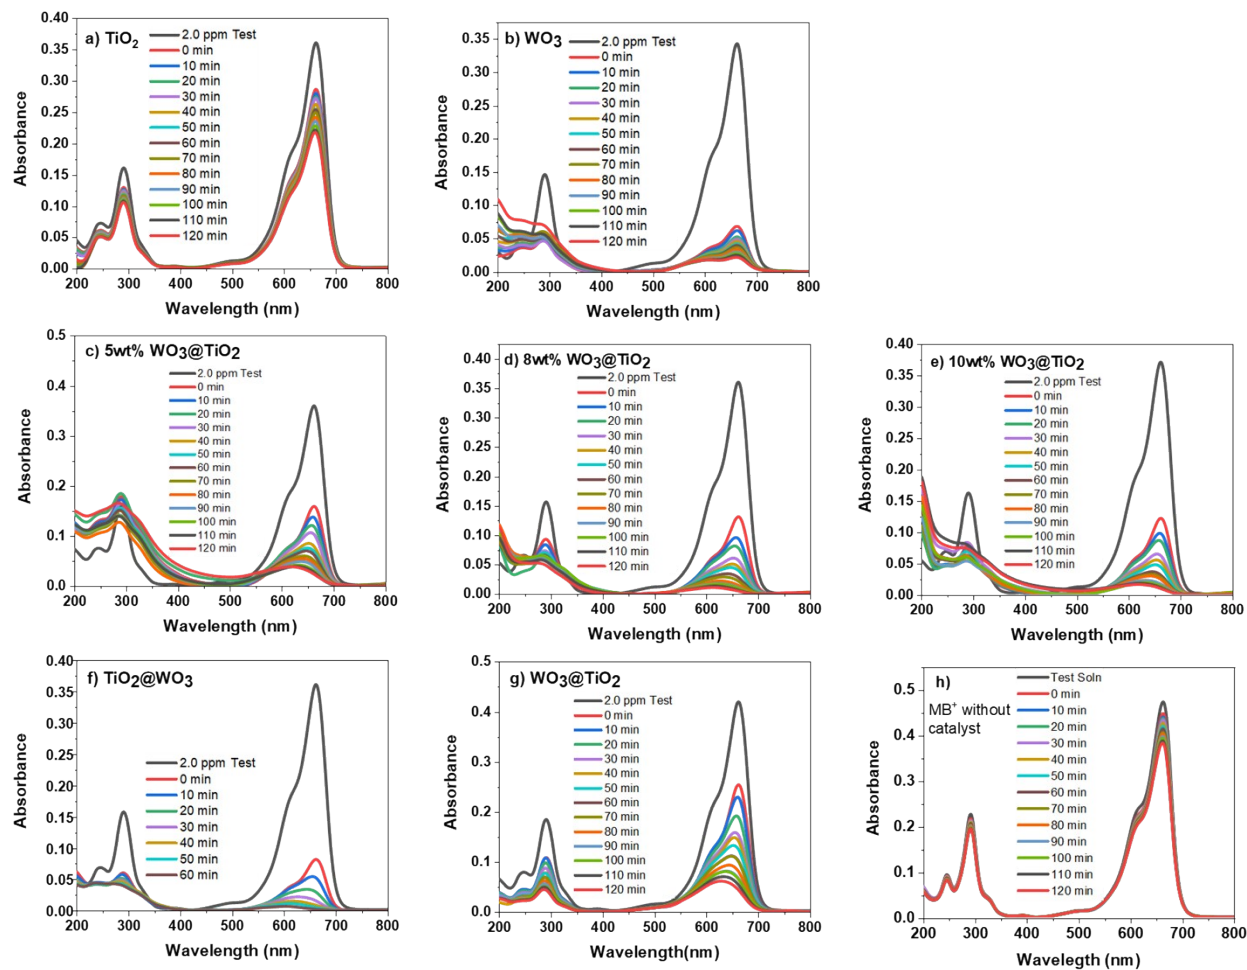

**Figure S4.** Absorption spectra of MB<sup>+</sup> with various nanocomposites under UV light and without nanocomposite under UV light.

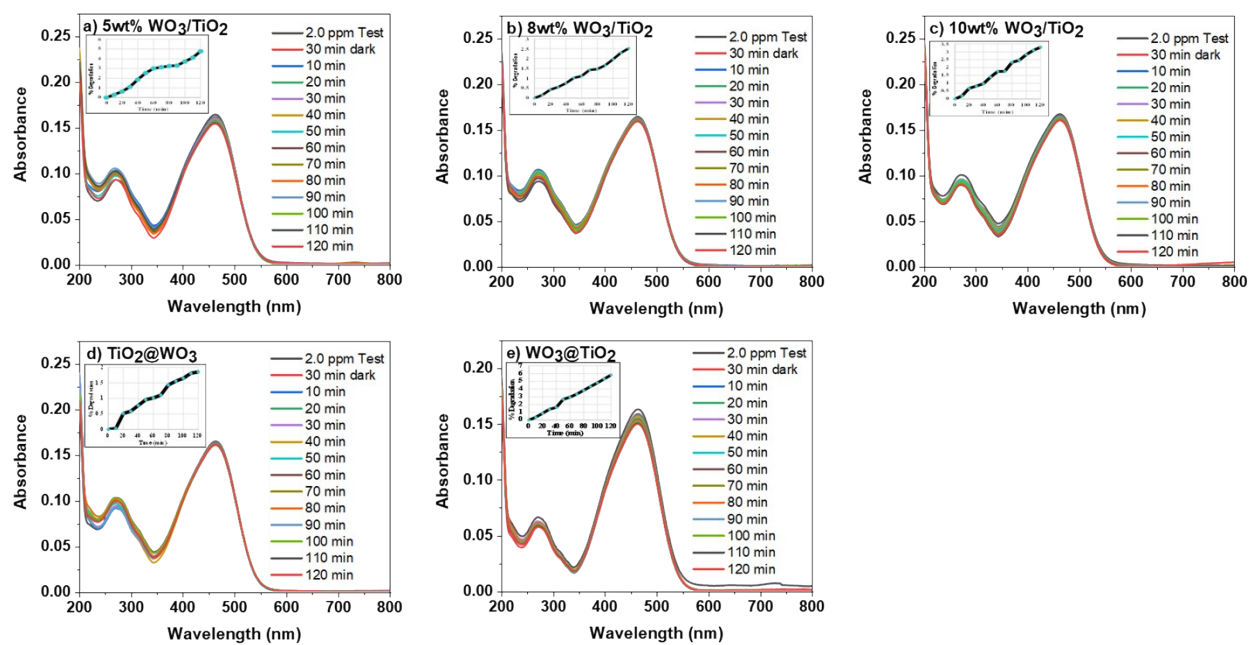

**Figure S5.** Absorption spectra of  $\text{MO}^-$  with various nanocomposites under UV light and without nanocomposite under UV light.
